# Supplementary material for: Minutely dispersed ruthenium in tremella-like N-doped carbon for enhanced visible-light-driven photocatalytic hydrogen production by CdS quantum dots
Source: Royal Society of Chemistry journal article supplement (doi:10.1039/d2qi01259f), 2022-01-01
Supplement: d2qi01259f1.pdf [file d2qi01259f1.pdf]

Electronic Supplementary Material (ESI) for Inorganic Chemistry Frontiers.  
This journal is © the Partner Organisations 2022

## Electronic Supplementary Information

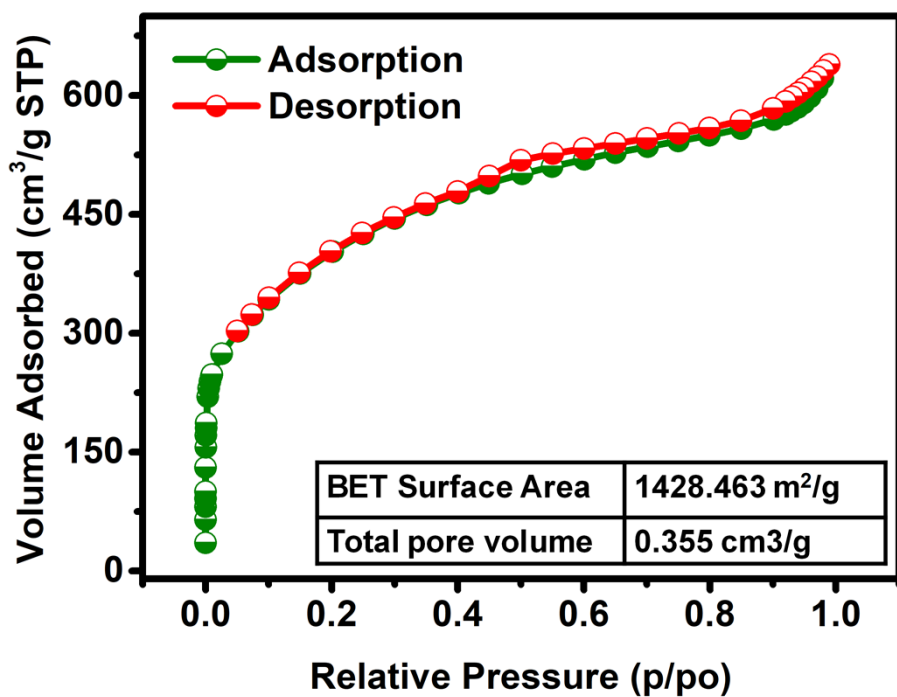

Figure S1. Nitrogen adsorption–desorption isotherm curves of Ru/NC-0.1.

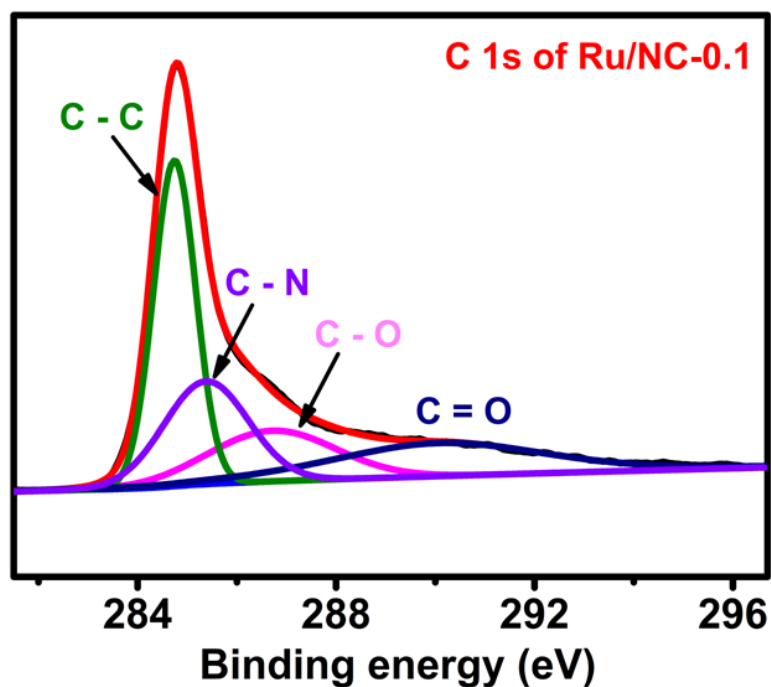

Figure S2. High-resolution XPS spectrum of C 1s.

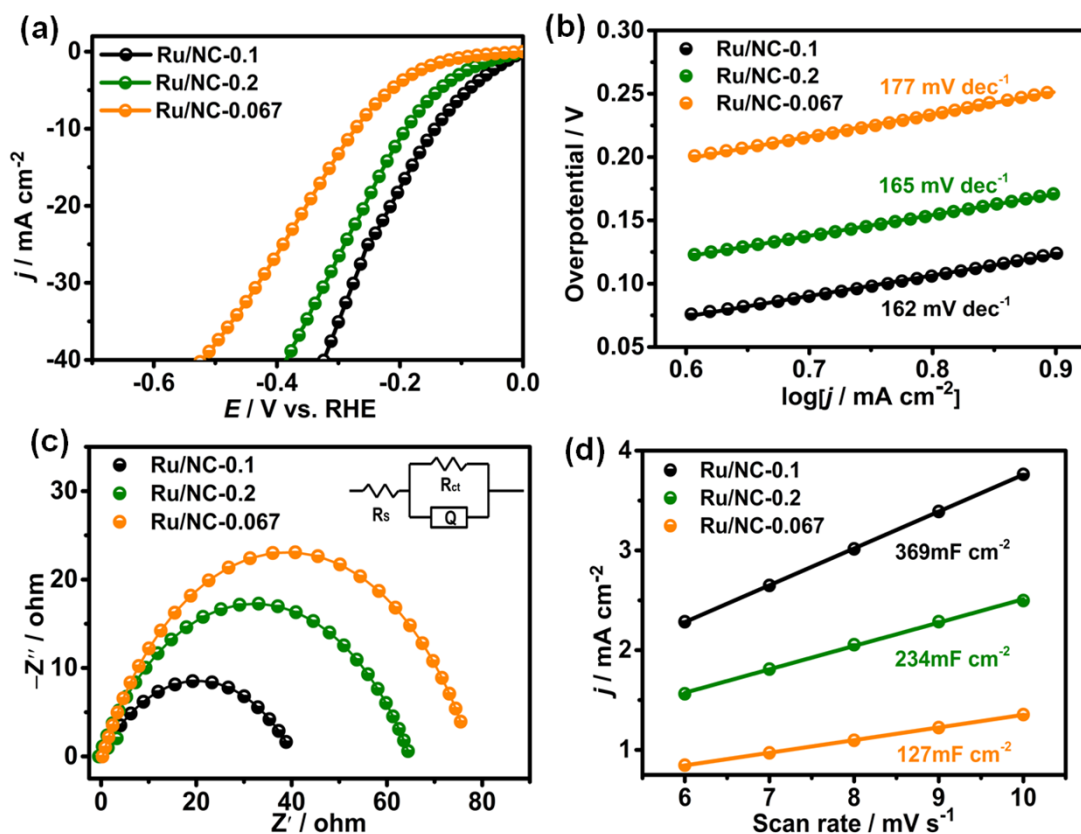

**Figure S3.** (a) Polarization curves of electrocatalytic  $\text{H}_2$  evolution of Ru/NC-0.1, Ru/NC-0.2 and Ru/NC-0.067 in aqueous lactic acid (10% v/v) containing 0.5 M  $\text{Na}_2\text{SO}_4$  at a scan rate of 5  $\text{mV s}^{-1}$ . (b) Corresponding Tafel plots. (c) Measured (dot) and fitted (line) Nyquist plots an applied overpotential of 200 mV vs. RHE. (d) Linear plots of the capacitive current vs. the scan rates of the catalysts.  $C_{dl}$  was obtained from the half of the slopes.

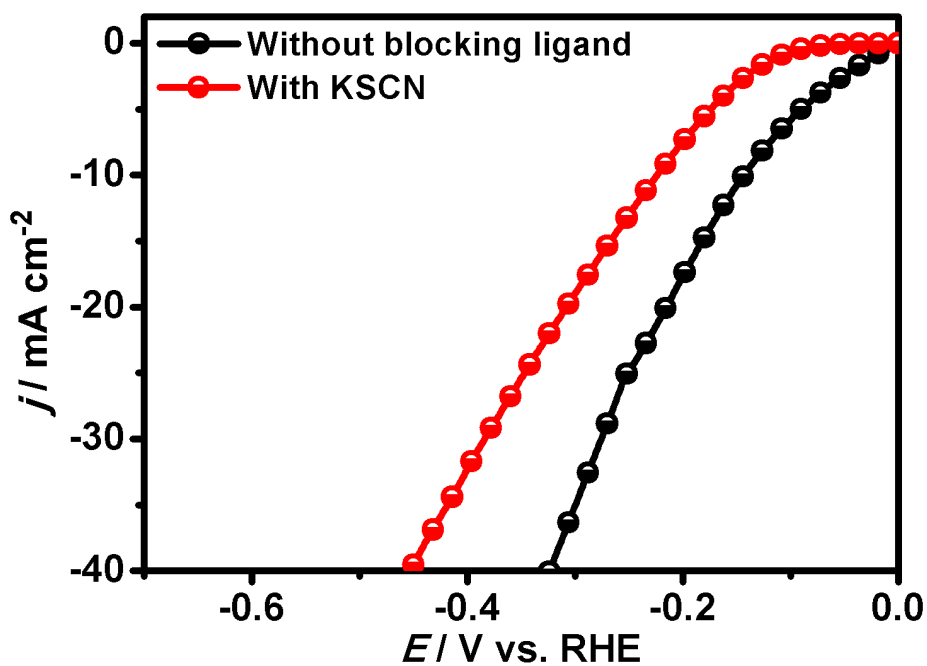

**Figure S4.** Polarization curves of electrocatalytic H<sub>2</sub> evolution of Ru/NC-0.1 with and without KSCN in aqueous lactic acid (10% v/v) containing 0.5 M Na<sub>2</sub>SO<sub>4</sub> at a scan rate of 5 mV s<sup>-1</sup>.

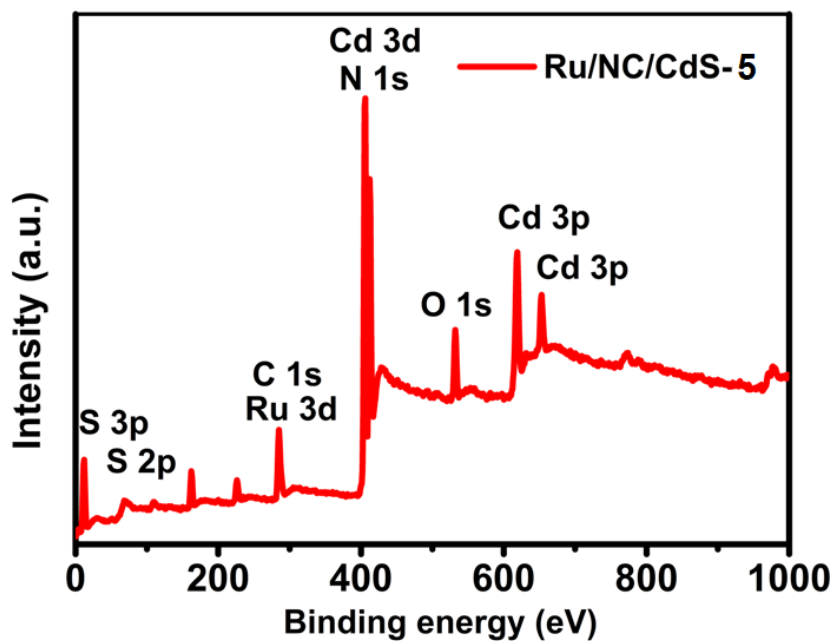

**Figure S5.** XPS spectrum of Ru/NC/CdS-5

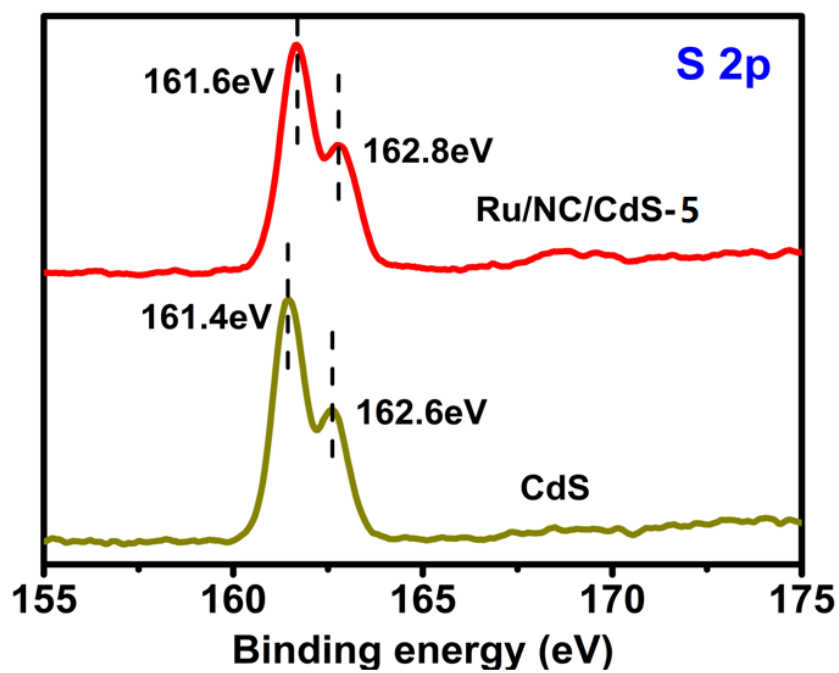

Figure S6. High-resolution XPS spectra of S 2p for Ru/NC/CdS-5 and CdS.

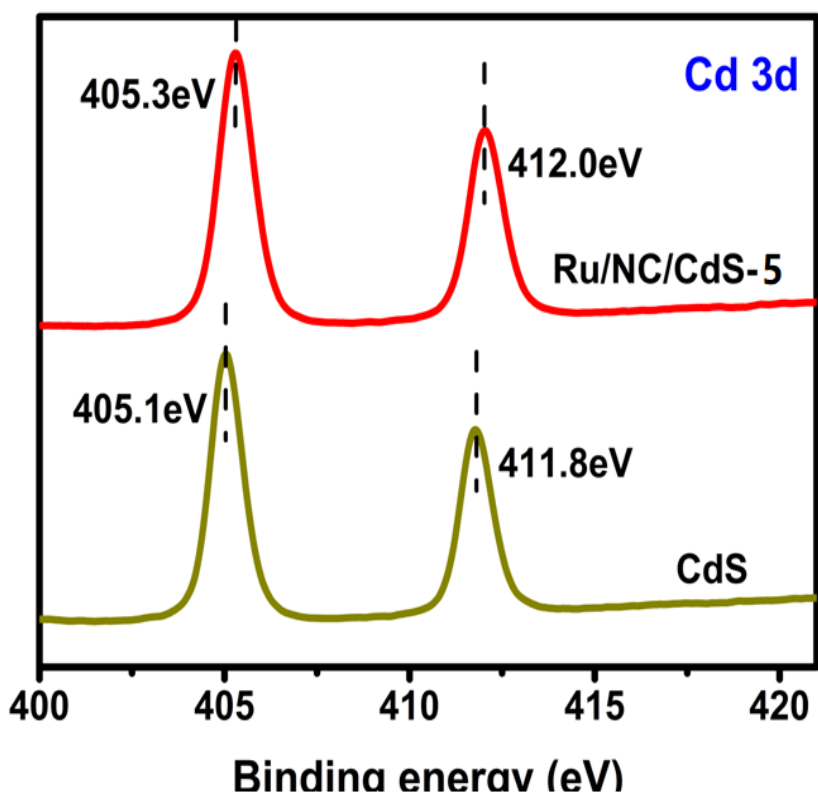

Figure S7. High-resolution XPS spectra of Cd 3d for Ru/NC/CdS-5 and CdS.

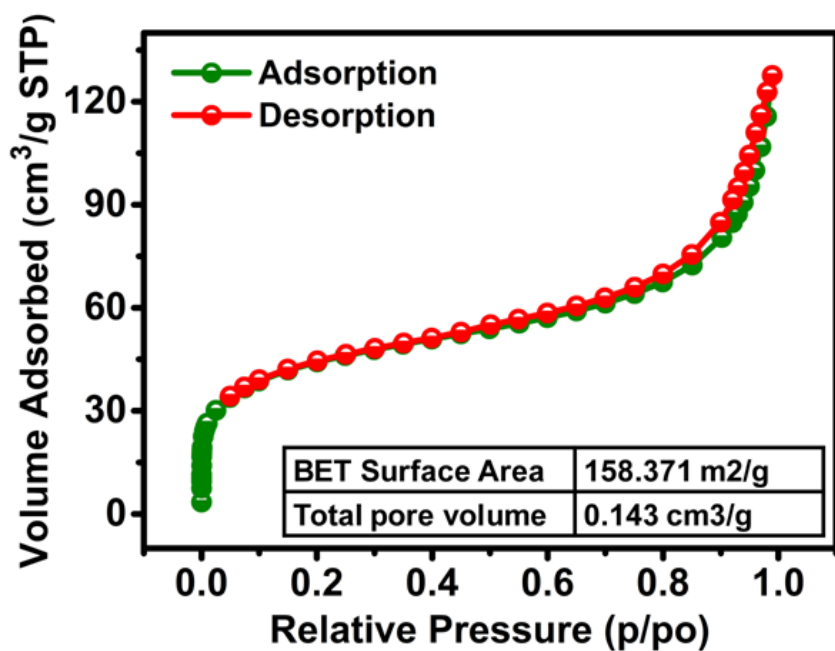

Figure S8. Nitrogen adsorption–desorption isotherms curves of Ru/NC/CdS-5.

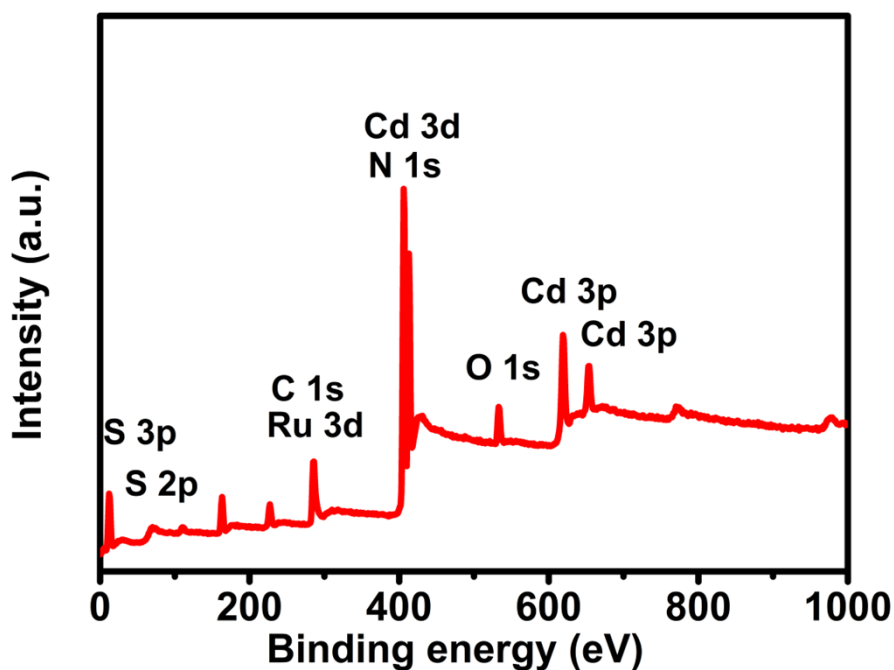

Figure S9. XPS spectrum of Ru/NC/CdS-5 after photo catalysis.

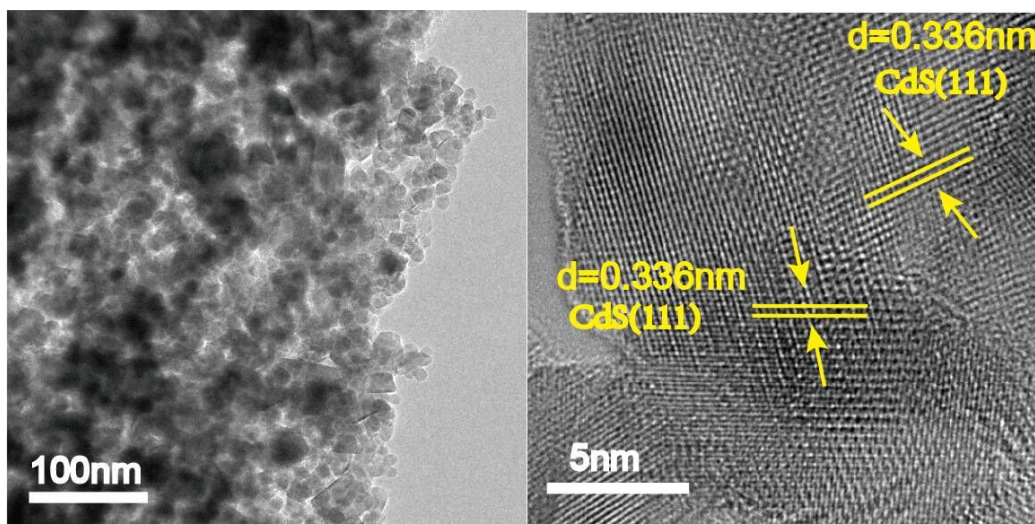

Figure S10. TEM of Ru/NC/CdS-5 after photo catalysis.

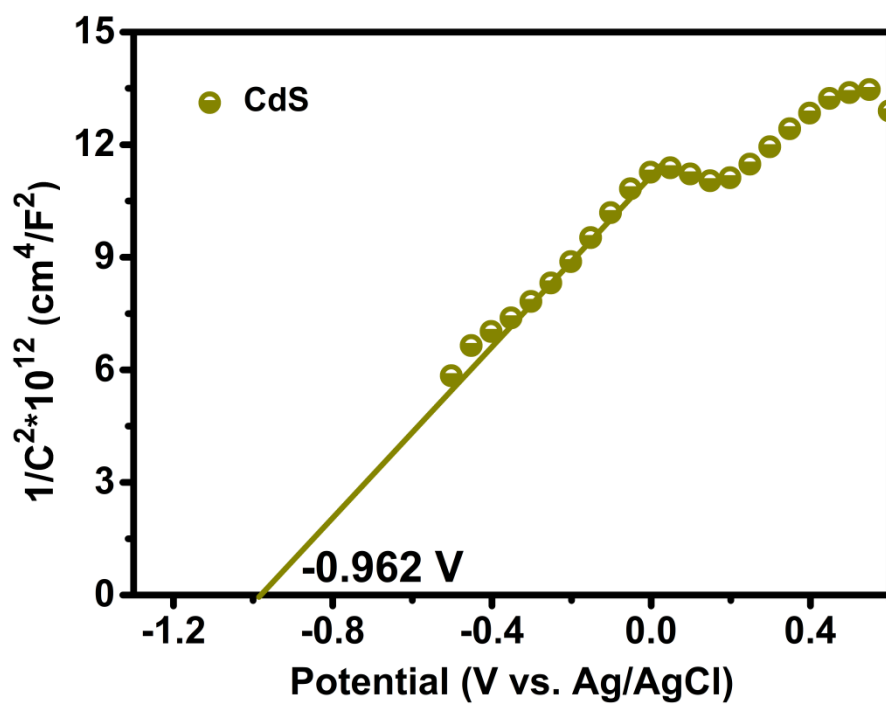

Figure S11. Mott-Schottky plot of the  $1/C_{SC}^2$  as a function of voltage (E) relative to the redox potential of Ag/AgCl for CdS.

**Table S1.** Summary of the recent reported CdS-based photocatalysts and other photocatalysts for H<sub>2</sub> generation.

| <b>Photocatalyst</b>    | <b>Co-Catalysts</b>             | <b>Sacrificial reagent</b>                            | <b>Light source</b>           | <b>Activity (mmol h<sup>-1</sup> g<sup>-1</sup>)</b> | <b>Reference</b> |
|-------------------------|---------------------------------|-------------------------------------------------------|-------------------------------|------------------------------------------------------|------------------|
| <b>CdS</b>              | <b>Ru/NC</b>                    | <b>Lactic acid</b>                                    | <b>300W Xe lamp (λ ≥ 420)</b> | <b>73.6</b>                                          | <b>this work</b> |
| CdS QDs                 | CeO <sub>2</sub>                | Na <sub>2</sub> SO <sub>3</sub> and NaSO <sub>4</sub> | 300W Xe lamp (λ ≥ 420)        | 0.101                                                | 1                |
| CQDs@CdS                | Ni <sub>4</sub> P <sub>2</sub>  | H <sub>2</sub> O                                      | LED (λ ≥ 420)                 | 0.145                                                | 2                |
| 0.05CIGCS-R             | Pt-G <sub>cys</sub>             | Lactic acid                                           | 300W Xe lamp (λ ≥ 420)        | 29.8                                                 | 3                |
| CdS QDs                 | g-C <sub>3</sub> N <sub>4</sub> | Methanol                                              | 300W Xe lamp (λ ≥ 420)        | 0.172                                                | 4                |
| CQDs-CaTiO <sub>3</sub> |                                 | Methanol                                              | PLS-SXE-300C(320-750nm)       | 6.5                                                  | 5                |
| ZIS-100CN               |                                 | TEOA                                                  | 300W Xe lamp (λ ≥ 400nm)      | 11.914                                               | 6                |
| ZnTCPP/THPP             |                                 | Ascorbic acid                                         | 300W Xe lamp (λ ≥ 420nm)      | 41.4                                                 | 7                |
| Ti-MOF/COF              |                                 | Ascorbic acid                                         | 300W Xe lamp (λ ≥ 400nm)      | 13.98                                                | 8                |



|                                                  |                                                          |                                                 |       |    |
|--------------------------------------------------|----------------------------------------------------------|-------------------------------------------------|-------|----|
| Cd <sub>0.4</sub> Zn <sub>0.6</sub> S            | Lactic acid                                              | 300W Xe lamp<br>( $\lambda \geq 420\text{nm}$ ) | 4.45  | 9  |
| D/A NPs                                          | Ascorbic acid                                            | Asahi Max 303                                   | 18.5  | 10 |
| 0.05CIGCS-R                                      | Lactic acid                                              | 5 W white light<br>multi-channel                | 16.16 | 11 |
| Cu/TiO <sub>2</sub>                              | Methanol                                                 | 300 W UV lamp                                   | ~5    | 12 |
| CQDs/CdS                                         | Na <sub>2</sub> S and<br>Na <sub>2</sub> SO <sub>3</sub> | 5 W LED ( $\lambda$<br>$\geq 420$ nm)           | 17.5  | 13 |
| Ta <sub>3</sub> N <sub>5</sub> @ReS <sub>2</sub> | Na <sub>2</sub> S and<br>Na <sub>2</sub> SO <sub>3</sub> | 300 W Xenon<br>lamp                             | 0.739 | 14 |

## References

- [1] Y. Ma, Y. Bian, Y. Liu, A. Zhu, H. Wu, H. Cui, D. Chu and J. Pan, Construction of Z-scheme system for enhanced photocatalytic H<sub>2</sub> evolution based on CdS quantum dots/CeO<sub>2</sub> nanorods heterojunction, *ACS Sustain. Chem. Eng.* 2018, **6**, 2552-2562.
- [2] Y. Dong, Q. Han, Q. Hu, C. Xu and Y. Lan, Carbon quantum dots enriching molecular nickel polyoxometalate over CdS semiconductor for photocatalytic water splitting, *Appl. Catal. B-Environ.*, 2021, **293**, 120214.
- [3] Z. Fang, Y. Wang, J. Song, Y. Sun, J. Zhou, R. Xu and H. Duan, Immobilizing CdS quantum dots and dendritic Pt nanocrystals on thiolated graphene nanosheets toward highly efficient photocatalytic H<sub>2</sub> evolution, *Nanoscale*, **2013**, **5**, 9830-9838.
- [4] L. Ge, F. Zuo, J. Liu, Q. Ma, C. Wang, D. Sun, L. Bartels and P. Feng, *J. Phys. Chem. C*, Synthesis and efficient visible light photocatalytic hydrogen evolution of polymeric g-C<sub>3</sub>N<sub>4</sub> coupled with CdS quantum dots, 2012, **116**, 13708-13714.

- [5] H. Zhao, J. Liu, C. F. Li, X. Zhang, Y. Li, Z. Y. Hu, B. Li, Z. Chen, J. Hu and B. L. Su, Meso-microporous nanosheet-constructed 3DOM perovskites for remarkable photocatalytic hydrogen production, *Adv. Funct. Mater.*, 2022, 2112831.
- [6] M Tan, Y. Ma, C. Yu, Q. Luan, J. Li, C. Liu, W. Dong, Y. Su, L. Qiao, L. Gao, Q. Lu and Y. Bai, Boosting photocatalytic hydrogen production via interfacial engineering on 2D ultrathin Z-scheme  $\text{ZnIn}_2\text{S}_4/\text{g-C}_3\text{N}_4$  heterojunction, *Adv. Funct. Mater.*, 2021, 2111740.
- [7] J. Jing, J. Yang, W. Li, Z. Wu and Y. Zhu, Construction of interfacial electric field via dual-porphyrin heterostructure boosting photocatalytic hydrogen evolution, *Adv. Mater.*, 2022, **34**, 2106807.
- [8] C. X. Chen, Y. Y. Xiong, X. Zhong, P. C. Lan, Z. W. Wei, H. Pan, P. Y. Su, Y. Song, Y. F. Chen, A. Nafady, Sirajuddin and S. Ma, Enhancing photocatalytic hydrogen production via the construction of robust multivariate Ti-MOF/COF composites, *Angew. Chem. Int. Edit.*, 2022, **61**, 202114071.
- [9] S. Lin, S. Li, H. Huang, H. Yu and Y. Zhang, Synergetic piezo-photocatalytic hydrogen evolution on  $\text{Cd}_x\text{Zn}_{1-x}\text{S}$  solid-solution 1D nanorods, *Small*, 2022, **18**, 2106420.
- [10] J. Kosco, S. Gonzalez-Carrero, C. T. Howells, W. Zhang, M. Moser, R. Sheelamanthula, L. Zhao, B. Willner, T. C. Hidalgo, H. Faber, B. Purushothaman, M. Sachs, H. Cha, R. Sougrat, T. D. Anthopoulos, S. Inal and J. R. Durrant, Oligoethylene glycol side chains increase charge generation in organic semiconductor nanoparticles for enhanced photocatalytic hydrogen evolution, *Adv. Mater.*, 2021, 2105007.
- [11] Z. Jin, T. Li, L. Zhang, X. Wang, G. Wang and X. Hao, Construction of a tandem S-scheme GDY/CuI/CdS-R heterostructure based on morphology-regulated graphdiyne ( $\text{g-C}_n\text{H}_{2n-2}$ ) for enhanced photocatalytic hydrogen evolution, *J. Mater. Chem. A*, 2022, **10**, 1976–1991.
- [12] L. Díaz, V. D. Rodríguez, M. González-Rodríguez, E. Rodríguez-Castellón, M. Algarra, P. Núñez and E. Moretti, M/TiO<sub>2</sub> (M = Fe, Co, Ni, Cu, Zn) catalysts for photocatalytic hydrogen production under UV and visible light irradiation, *Inorg. Chem. Front.*, 2021, **8**, 3491–3500.
- [13] X. Hao, D. Xiang and Z. Jin, Amorphous  $\text{Co}_3\text{O}_4$  quantum dots hybridizing with 3D hexagonal CdS single crystals to construct a 0D/3D p–n heterojunction for a highly efficient photocatalytic  $\text{H}_2$  evolution, *Dalton Trans.*, 2021, **50**, 10501–10514.
- [14] X. Zhan, Z. Fang, B. Li, H. Zhang, L. Xu, H. Hou and W. Yang, Rationally designed  $\text{Ta}_3\text{N}_5@\text{ReS}_2$  heterojunctions for promoted photocatalytic hydrogen production, *J. Mater. Chem. A*, 2021, **9**, 27084–27094.
